# Supplementary material for: Factors Associated with Withdrawal Time in European Colonoscopy Practice: Findings of the European Colonoscopy Quality Investigation (ECQI) Group
Source: MDPI journal article supplement (doi:10.3390/diagnostics12020503), 2022-02-15
Supplement: s1 [file s1]

# PROCEDURE

## Patient Information

**1. Year of birth:**

 YYYY

**2. Gender: (Please select one)**

☐ Male ☐ Female

**3. Height:**

 cm

**4. Weight:**

 kg

**5. BMI:**

 kg/m<sup>2</sup>

**6. Type: (Please select one)**

☐ In-patient ☐ Out-patient

## Pre-Procedure

**7. Patient referred by: (Please select one)**

- ☐ GP  
☐ Own speciality  
☐ Screening programme  
☐ Self-referred  
☐ Other (Please state)

**8. Reason for procedure: (Please select one)**

☐ Clinical signs and symptoms (Please select all that apply)

☐ Altered bowel

☐ Pain

☐ Rectal bleeding

☐ Other (Please state)

☐ Follow-up

☐ Following positive screening test

☐ Previous unsuccessful procedure

☐ Screening due to familial risk

☐ Screening without pre-screening test

☐ Other (Please state)

**9. Bowel preparation used? (Please select one)**

☐ Yes (Please answer the following) ☐ No

**Type, including additional products: (Please select all that apply)**

☐ 2 litre PEG and ascorbate

☐ 4 litre PEG

☐ Bisacodyl

☐ Enema

☐ Sodium phosphate

☐ Sodium picosulphate and magnesium citrate

☐ Tri-sulphate

☐ Other (Please state)

**Dosing regimen: (Please select one)**

☐ Evening

☐ Same day

☐ Split

☐ Other (Please state)

**Did the patient follow the bowel preparation instructions? (Please select one)**

☐ Yes ☐ No

**How much bowel preparation was consumed? (Please select one)**

- ☐ 0 - 25%
- ☐ 25 - 50%
- ☐ 50 - 75%
- ☐ 75 - 99 %
- ☐ 100%

**How much fluid was consumed in total, including additional products? (Please select one)**

- ☐ 0 - 1 litre
- ☐ 1 - 3 litres
- ☐ 3 - 6 litres
- ☐ Over 6 litres

**Time period between last intake of bowel preparation and procedure:**

hours

**10. Time of colonoscopy:**

HH:MM

**11. Patient had a total colonoscopy in the last 5 years? (Please select one)**

- ☐ Yes (Please answer the following) ☐ No

**Date of last total colonoscopy:**

MM  YYYY

## Procedure

**12. Sedation-related medications administered? (Please select one)**

- ☐ Yes (Please select all that apply) ☐ No

- ☐ Entonox
- ☐ General Anaesthesia
- ☐ Midazolam
- ☐ Opiates
- ☐ Propofol
- ☐ Other (Please state)

**13. Procedure-related medications administered? (Please select one)**

☐ Yes (Please select all that apply) ☐ No

☐ Buscopan

☐ Glucagon

☐ Other (Please state)

**14. Medication administered by: (Please select all that apply)**

☐ Anaesthetist

☐ Endoscopist

☐ Qualified nurse

☐ Second doctor

☐ Other (Please state)

**15. Chromoendoscopy used? (Please select one)**

☐ Yes (Please select all that apply) ☐ No

☐ Localised (digital)

☐ Localised (dye)

☐ Pan (digital)

☐ Pan (dye)

**16. High definition equipment used? (Please select one)**

☐ Yes (Please select all that apply) ☐ No ☐ Don't know

☐ Scope

☐ Monitor/Screen

**17. Assistive technology used? (Please select one)**

☐ Yes (Please select all that apply) ☐ No

☐ Cap-assisted

☐ Endocuff-assisted

☐ Scope guide

☐ X-ray

☐ Other (Please state)

**18. Intended endpoint: (Please select one)**

☐ Anastomosis

☐ Caecum

☐ Terminal ileum/Neo terminal ileum

**19. Endpoint photo documented? (Please select one)**

☐ Yes ☐ No

**20. Intended endpoint reached? (Please select one)**

☐ Yes ☐ No (Please select one)

☐ Insufficient preparation

☐ Pain

☐ Pathology encountered

☐ Stricture

☐ Technically difficult

☐ Unsafe procedure

☐ Other (Please state)

**21. Retraction time recorded? (Please select one)**

☐ Yes (Please state time) ☐ No

minutes

**22. Abnormal endoscopic finding? (Please select one)**

☐ Yes (Please select all that apply) ☐ No

☐ Cancer

☐ Diverticulae

☐ Inflammation

☐ Polyps

☐ Other (Please state)

**Right Colon Segment Classification**

**23. Cleansing quality: (Please select one) \***

☐ Excellent

☐ Good

☐ Poor

☐ Inadequate

**24. Polyps detected? (Please select one)**

☐ Yes (Please answer the following) ☐ No

**Number of polyps:**

**Type of polyps: (Please select all that apply)**

- ☐ Protruded lesion: Pedunculated polyp (Ip)
- ☐ Protruded lesion: Subpedunculated polyp (Isp)
- ☐ Protruded lesion: Sessile polyp (Is)
- ☐ Flat elevated lesion: Flat elevation of mucosa (O-IIa)
- ☐ Flat elevated lesion: Flat elevation with central depression (O-IIa/c)
- ☐ Flat lesion: Flat mucosal change (O-IIb)
- ☐ Flat lesion: Mucosal depression (O-IIc)
- ☐ Flat lesion: Mucosal depression with raised edge (O-IIc/IIa)

**Size of largest polyp:**

 mm

**Were you able to characterise the endoscopic appearance of highest grade polyp? (Please select one)**

☐ Yes (Please select one) ☐ No

- ☐ Adenoma
- ☐ Hyperplastic
- ☐ Malignant
- ☐ Sessile serrated

**Transverse Colon Segment Classification**

**25. Cleansing quality: (Please select one) \***

- ☐ Excellent
- ☐ Good
- ☐ Poor
- ☐ Inadequate

**26. Polyps detected? (Please select one)**

☐ Yes (Please answer the following) ☐ No

**Number of polyps:**

**Type of polyps: (Please select all that apply)**

- ☐ Protruded lesion: Pedunculated polyp (Ip)
- ☐ Protruded lesion: Subpedunculated polyp (Isp)
- ☐ Protruded lesion: Sessile polyp (Is)
- ☐ Flat elevated lesion: Flat elevation of mucosa (O-IIa)
- ☐ Flat elevated lesion: Flat elevation with central depression (O-IIa/c)
- ☐ Flat lesion: Flat mucosal change (O-IIb)
- ☐ Flat lesion: Mucosal depression (O-IIc)
- ☐ Flat lesion: Mucosal depression with raised edge (O-IIc/IIa)

**Size of largest polyp:**

 mm

**Were you able to characterise the endoscopic appearance of highest grade polyp? (Please select one)**

☐ Yes (Please select one) ☐ No

- ☐ Adenoma
- ☐ Hyperplastic
- ☐ Malignant
- ☐ Sessile serrated

**Left Colon Segment Classification**

**27. Cleansing quality: (Please select one) \***

- ☐ Excellent
- ☐ Good
- ☐ Poor
- ☐ Inadequate

**28. Polyps detected? (Please select one)**

☐ Yes (Please answer the following) ☐ No

**Number of polyps:**

**Type of polyps: (Please select all that apply)**

- ☐ Protruded lesion: Pedunculated polyp (Ip)
- ☐ Protruded lesion: Subpedunculated polyp (Isp)
- ☐ Protruded lesion: Sessile polyp (Is)
- ☐ Flat elevated lesion: Flat elevation of mucosa (O-IIa)
- ☐ Flat elevated lesion: Flat elevation with central depression (O-IIa/c)
- ☐ Flat lesion: Flat mucosal change (O-IIb)
- ☐ Flat lesion: Mucosal depression (O-IIc)
- ☐ Flat lesion: Mucosal depression with raised edge (O-IIc/IIa)

**Size of largest polyp:**

 mm

**Were you able to characterise the endoscopic appearance of highest grade polyp? (Please select one)**

☐ Yes (Please select one) ☐ No

- ☐ Adenoma
- ☐ Hyperplastic
- ☐ Malignant
- ☐ Sessile serrated

**\* Boston Bowel Preparation Scale (BBPS)**

Questions 23, 25, and 27 relate to the BBPS.

**Excellent (3):** Entire mucosa of colon segment seen well with no residual staining, small fragments of stool or opaque liquid.

**Good (2):** Minor amount of residual staining, small fragments of stool and/or opaque liquid, but mucosa of colon segment seen well.

**Poor (1):** Portion of mucosa of the colon segment seen, but other areas of the colon segment not well seen due to staining, residual stool and/or opaque liquid.

**Inadequate (0):** Unprepared colon segment with mucosa not seen due to solid stool that cannot be cleared.

The calculated total score and grade will be displayed following segment classification.



**29. Bowel cleansing considered acceptable for the purpose of the procedure? (Please select one)**

☐ Yes ☐ No

**30. Endoscopic intervention? (Please select one)**

☐ Yes (Please select all that apply) ☐ No

- ☐ Dilation of stenosis
- ☐ Endoscopic mucosal resection
- ☐ Endoscopic submucosal dissection
- ☐ Haemostasis
- ☐ Perforation repair by endoscopist
- ☐ Polypectomy (complete)
- ☐ Polypectomy (incomplete)
- ☐ Stent insertion
- ☐ Tattooing
- ☐ Other (Please state)

**31. Immediate complications? (Please select one)**

☐ Yes (Please select all that apply) ☐ No

- ☐ Bleeding requires admission
- ☐ Perforation (Please select one)
  - ☐ Repaired
  - ☐ Not repaired
- ☐ Sedation-related
- ☐ Severe pain
- ☐ Other (Please state)

## Post Procedure

### 32. Non-routine (immediate) repeat procedure required? *(Please select one)*

☐ Yes *(Please select one)* ☐ No

- ☐ Further treatment or intervention required
- ☐ Insufficient bowel preparation
- ☐ Pain
- ☐ Pathology encountered
- ☐ Stricture
- ☐ Technically difficult
- ☐ Unsafe procedure
- ☐ Other *(Please state)*

### 33. Patient successfully discharged, if classified as out-patient? *(Please select one)*

☐ Yes ☐ No

## Evaluation

### 34. Time to complete this form:

minutes

**Important:** Adverse events should be reported using the AE reporting system in the relevant country.
